# Supplementary material for: Impact of post-processing methods on apparent diffusion coefficient values
Source: PubMed Central journal article supplement (PMC5591618; doi:10.1007/s00330-016-4403-6), 2016-06-01
Supplement: 330_2016_4403_MOESM1_ESM.pdf [file 330_2016_4403_MOESM1_ESM.pdf]

## Supplementary material

### Content

|                                                                                                                 |          |
|-----------------------------------------------------------------------------------------------------------------|----------|
| <b>ADC calculation</b> .....                                                                                    | <b>1</b> |
| <b>The choice of the b-values</b> .....                                                                         | <b>2</b> |
| <b>Exploratory subgroup analysis</b> .....                                                                      | <b>4</b> |
| Is there an influence, if patient based analysis (PBA) is favored instead of lesion based analysis (LBA)? ..... | 5        |
| Is there an influence, if lesions are stratified by pathology? .....                                            | 8        |
| References.....                                                                                                 | 15       |

### ADC calculation

The degree of signal attenuation depends on multiple factors as shown in [1]

$$[I] \quad SI = SI_0 * e^{-b*D}$$

$SI_0$  = signal intensity of the T2-weighted image without applied gradient pulse

$b$  = b value: degree of diffusion weighting [ $s/mm^2$ ], depending on gradient amplitude, duration and temporal spacing of the two motion-probing gradients

$D$  = diffusion coefficient

With a set of two different b values the formula can be applied as follows[2]:

$$[II] \quad ADC = \frac{\ln \frac{SI_1}{SI_0}}{b_0 - b_1} \quad [mm^2/s]$$

This formula demonstrates that in a two-point technique the ADC represents the slope of a semi-logarithmic curve which is obtained when the logarithm of relative signal intensity in a tissue is plotted along the y-axis and b values along the x-axis [3].

In the case of more b values, other techniques to determine a regression curve have to be performed. In the simplest case, a linear relationship between the variables is supposed. One example is the ordinary (linear) least squares estimation[4,5]: “Least squares” means that the method is based on the principle to keep as low as possible the sum of the squares of the errors i.e. the distance from the calculated regression curve.

The regression coefficient  $b_{yx}$  is calculated as follows [6]:

$$[III] \quad b_{xy} = \frac{\sum_{i=1}^n ((x_i - \bar{x}) * (y_i - \bar{y}))}{\sum_{i=1}^n (x_i - \bar{x})^2}$$

- $x_i, y_i$  = variables
- $\bar{x}, \bar{y}$  = arithmetic mean of x resp. y

So, in a set of three b values (e.g. 50, 400, 800 s/mm<sup>2</sup>), the equation would be:

$$(IV) \quad ADC = \frac{(b_{50} - \bar{b}) * (\ln SI_{50} - \overline{\ln SI}) + (b_{400} - \bar{b}) * (\ln SI_{400} - \overline{\ln SI}) + (b_{800} - \bar{b}) * (\ln SI_{800} - \overline{\ln SI})}{(b_{50} - \bar{b})^2 + (b_{400} - \bar{b})^2 + (b_{800} - \bar{b})^2}$$

### The choice of the b-values

It has been postulated that in sets of three b-values, if the third b-value (e.g. 0, 400, 800 s/mm<sup>2</sup> or 0, 500, 1000 s/mm<sup>2</sup>) is a multiple of the second, the latter should have no impact on the line slope, i.e. the ADC[7]. Regarding at

$$[I] \quad ADC = \frac{(b_{50} - \bar{b}) * (\ln SI_{50} - \overline{\ln SI}) + (b_{400} - \bar{b}) * (\ln SI_{400} - \overline{\ln SI}) + (b_{800} - \bar{b}) * (\ln SI_{800} - \overline{\ln SI})}{(b_{50} - \bar{b})^2 + (b_{400} - \bar{b})^2 + (b_{800} - \bar{b})^2}$$

this would signify, that

$$[II] \quad (b_{400} - \bar{b}) * (\ln SI_{400} - \overline{\ln SI}) = 0$$

or simpler

$$[III] \quad b_{400} - \bar{b} = 0$$

This demonstrates that if the middle b-value represents the arithmetic mean of the three b-values it actually has no impact on the ADC.

Thus we can calculate:

$$[IV] \quad ADC = \frac{(b_{50} - \bar{b}) * (\ln SI_{50} - \overline{\ln SI}) + (b_{800} - \bar{b}) * (\ln SI_{800} - \overline{\ln SI})}{(b_{50} - \bar{b})^2 + (b_{800} - \bar{b})^2}$$

In this case, mathematical simplification of (IV)

Considering

$$[V] \quad \overline{\ln SI} = \frac{\ln SI_{50} + \ln SI_{800}}{2} ; \bar{b} = \frac{b_{50} + b_{800}}{2} ; \ln SI_{50} - \ln SI_{800} = \ln \frac{SI_{50}}{SI_{800}}$$

leads to the original two-point formula

$$[VI] \quad ADC = \frac{\ln \frac{SI_{50}}{SI_{800}}}{b_{50} - b_{800}}$$

In our set of b-values 50, 400 and 800 s/mm<sup>2</sup> the arithmetic mean  $\bar{b} = 416,67$  differs slightly from 400.

**Exploratory subgroup analysis**

## Is there an influence, if patient based analysis (PBA) is favored instead of lesion based analysis (LBA)?

### Method:

- **PBA:** Definition of a new subgroup. Only one lesion per patient.
  - Patients with single lesions: Left unchanged
  - Patient with multiple lesions: Only one lesion included into analysis. Lesion selection as follows:
    - If primary lesion present (bronchial cancer ...), selection of the primary lesion and skipping of metastatic foci.
    - If no primary lesion evident *random* selection of one index lesion.
- Comparison of ADC metrics within each group (PBA and LBA):  
Friedman test for dependent samples, if test was  $P < 0,05$  → pairwise comparison of subgroups according to Conover was performed [8].

### Results:

The results of the whole study collective (LBA) can be reproduced in PBA were alike:

| Variable  | Different ( $P < 0,05$ ) from variable* | Comment                                                                                                                       |
|-----------|-----------------------------------------|-------------------------------------------------------------------------------------------------------------------------------|
| (1) ADC_1 | (2) (3) (4)                             | ADC_1 gives the lowest values                                                                                                 |
| (2) ADC_2 | (1) (4)                                 | ADC_2 and ADC_3:<br><ul style="list-style-type: none"> <li>• give the highest values</li> <li>• are similar (n.s.)</li> </ul> |
| (3) ADC_3 | (1) (4)                                 |                                                                                                                               |
| (4) ADC_4 | (1) (2) (3)                             | ADC_4 gives intermediate values                                                                                               |

\*for PBA and LBA

### Conclusion:

Results are not biased by the level of analysis. The same results are achieved for PBA and LBA.

## Details:

### PBA

| Variable  | Different ( $P < 0,05$ ) from variable nr |
|-----------|-------------------------------------------|
| (1) ADC_1 | (2) (3) (4)                               |
| (2) ADC_2 | (1) (4)                                   |
| (3) ADC_3 | (1) (4)                                   |
| (4) ADC_4 | (1) (2) (3)                               |

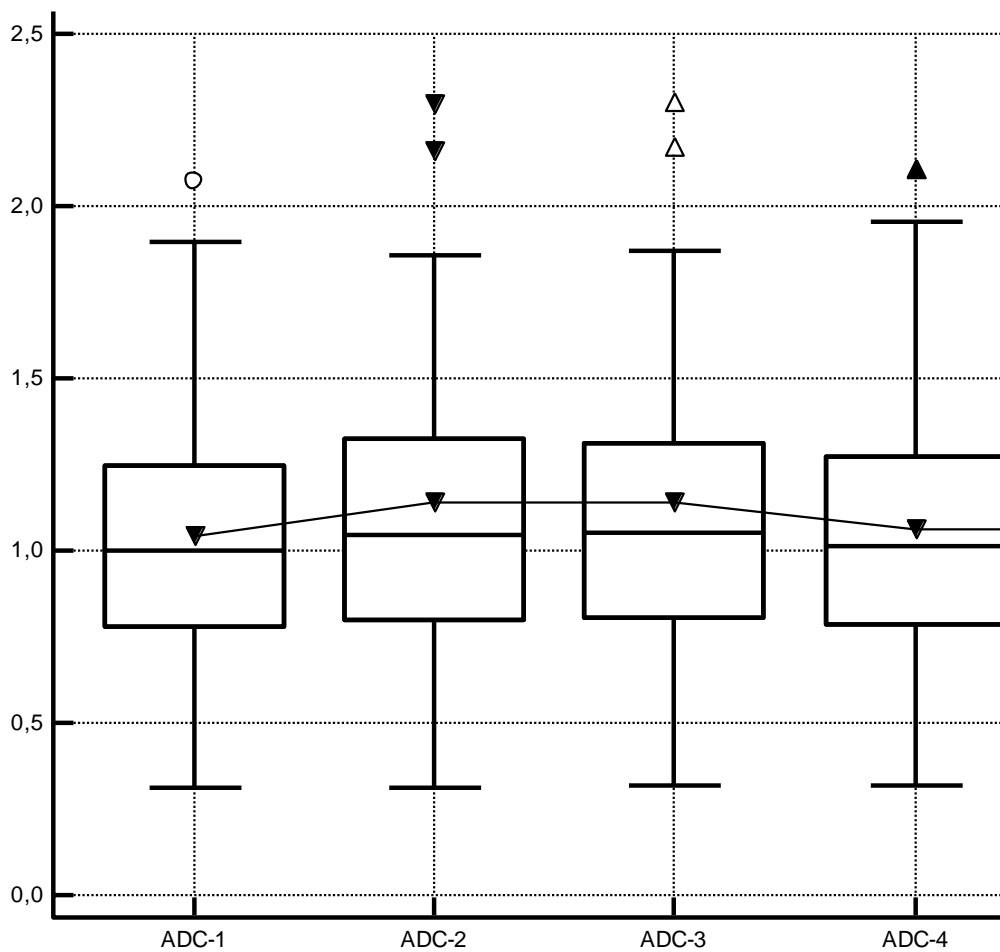

**Figure 1:** PBA – ADC values stratified by PPM. ADC (y-axis) are given in  $[10^{-3} \text{ mm}^2/\text{s}]$ .

## LBA

| Variable  | Different (P<0,05) from variable nr |
|-----------|-------------------------------------|
| (1) ADC_1 | (2) (3) (4)                         |
| (2) ADC_2 | (1) (4)                             |
| (3) ADC_3 | (1) (4)                             |
| (4) ADC_4 | (1) (2) (3)                         |

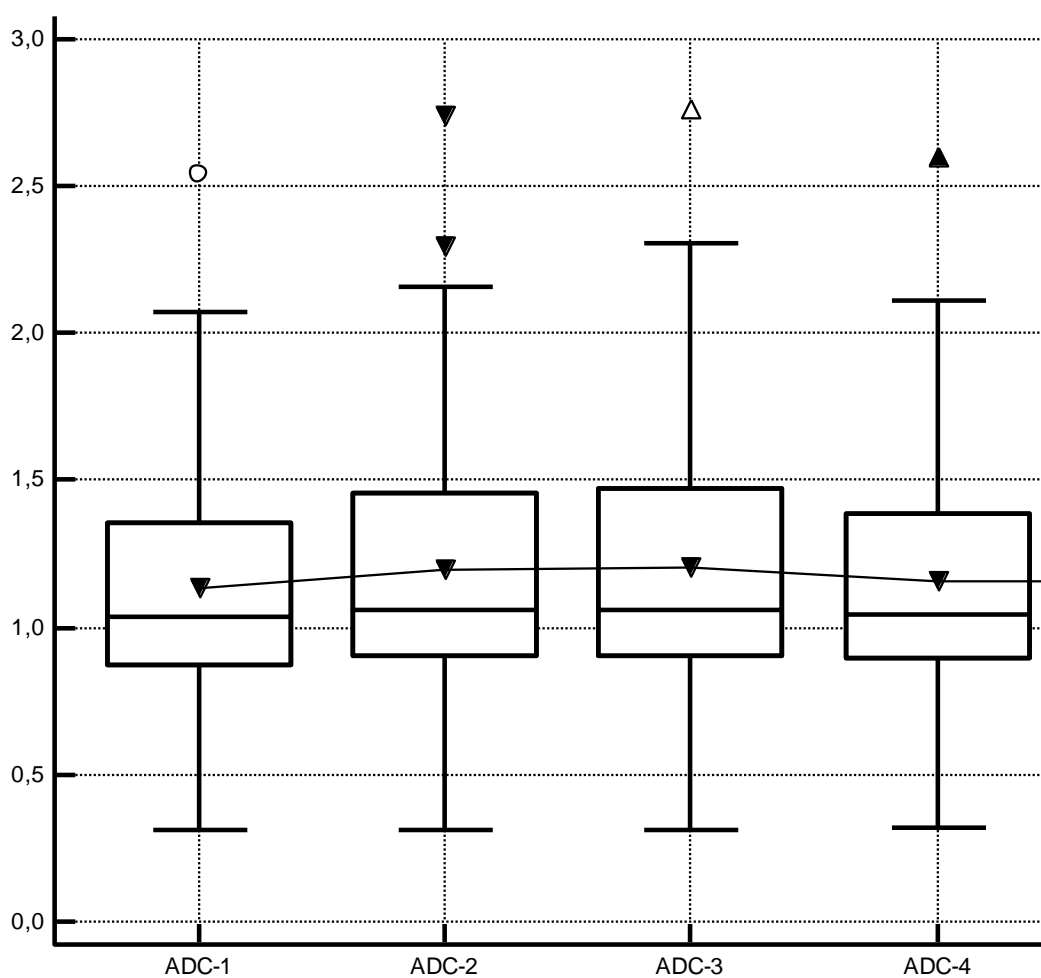

**Figure 2:** LBA – ADC-values stratified by PPM. ADC (y-axis) are given in  $[10^{-3} \text{ mm}^2/\text{s}]$ .

## Is there an influence, if lesions are stratified by pathology?

### Method:

- (I) Comparison of pathology (**LK**: lesion within lymph nodes. **Wo\_LN**: non-lymph node lesion) for each ADC metric by Mann-Whitney test for independent samples. For example
  - ADC\_1 lymph node case only vs. ADC\_1 non lymph node cases
  - ADC\_2 lymph node case only vs. ADC\_2 non lymph node cases
  - Etc.
- (II) Comparison of ADC metrics (ADC\_1, ADC\_2 etc.) within each pathology (given as lymph node vs. no lymph node. Stats: Friedman test for dependent samples, if test was  $P < 0,05$  pairwise comparison of subgroups according to Conover was performed [8]. For example:
  - Lymph node case only: ADC\_1 vs ADC\_2 vs ADC\_3 vs. ADC\_4
  - Non lymph node cases: ADC\_1 vs ADC\_2 vs ADC\_3 vs. ADC\_4

### Results:

- (I) Pairwise comparison of ADC metrics revealed at best only minor and non-significant differences for all methods: ADC\_1 ( $P = 0,68$ ), ADC\_2 ( $P = 0,93$ ), ADC\_3 ( $P = 0,91$ ), ADC\_4 ( $P = 0,60$ ) and ADC\_MWPP ( $P = 0,60$ ).
- (II) Differences of ADC metrics known from the whole patient collective could be reproduced in both subgroups (lymph nodes only vs. no lymph nodes)

➔ Details are listed below

### Conclusion:

Absent influence of pathology on our results in the given setting.



### Detailed results and graphs:

ADC\_1

| Sample 1              |             |                  |                  |
|-----------------------|-------------|------------------|------------------|
| Variable              | ADC_1_LN    |                  |                  |
| Sample 2              |             |                  |                  |
| Variable              | ADC_1_wo_LN |                  |                  |
|                       |             | Sample 1         | Sample 2         |
| Sample size           |             | 32               | 33               |
| Lowest value          |             | <u>0,3210</u>    | <u>0,3120</u>    |
| Highest value         |             | <u>1,9940</u>    | <u>2,5400</u>    |
| Median                |             | 1,0800           | 0,9980           |
| 95% CI for the median |             | 0,9670 to 1,2841 | 0,9142 to 1,2138 |
| Interquartile range   |             | 0,8500 to 1,3595 | 0,8733 to 1,3153 |

|                                       |                   |
|---------------------------------------|-------------------|
| Average rank of first group           | 33,9688           |
| Average rank of second group          | 32,0606           |
| Mann-Whitney U                        | 497,00            |
| Test statistic Z (corrected for ties) | 0,407             |
| Two-tailed probability                | <b>P = 0,6842</b> |

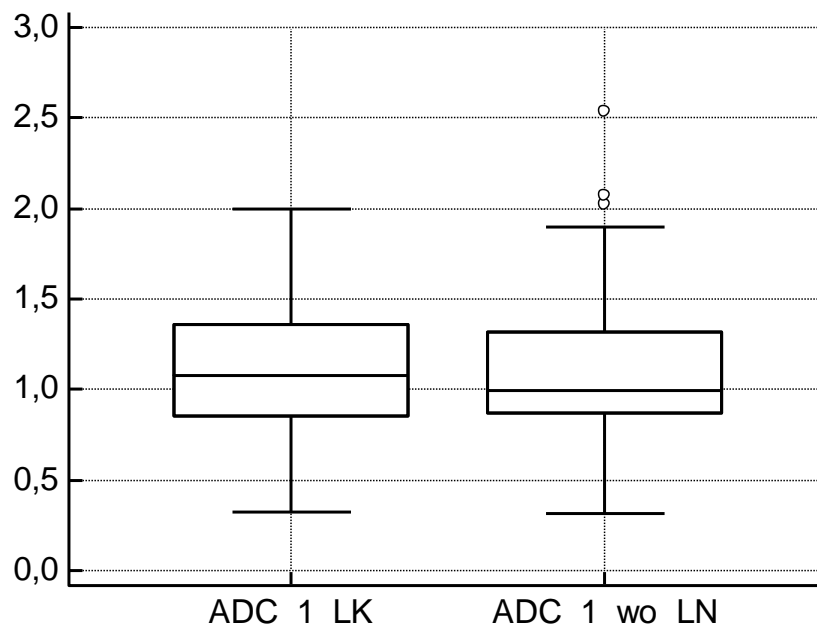

**Figure 3:** ADC\_1 stratified by pathology (lymph node cases vs. non lymph node cases: LK vs wo\_LN). ADC (y-axis) are given in  $[10^{-3} \text{ mm}^2/\text{s}]$ .

## ADC\_2

| Sample 1              |                  |                  |
|-----------------------|------------------|------------------|
| Variable              | ADC_2_LN         |                  |
| Sample 2              |                  |                  |
| Variable              | ADC_2_wo_LN      |                  |
|                       | Sample 1         | Sample 2         |
| Sample size           | 32               | 33               |
| Lowest value          | <u>0,4640</u>    | <u>0,3130</u>    |
| Highest value         | <u>2,1330</u>    | <u>2,7440</u>    |
| Median                | 1,1235           | 1,0560           |
| 95% CI for the median | 0,9639 to 1,2371 | 0,9816 to 1,2815 |
| Interquartile range   | 0,8955 to 1,4065 | 0,9050 to 1,4960 |

|                                       |            |
|---------------------------------------|------------|
| Average rank of first group           | 32,7812    |
| Average rank of second group          | 33,2121    |
| Mann-Whitney U                        | 521,00     |
| Test statistic Z (corrected for ties) | 0,0919     |
| Two-tailed probability                | P = 0,9268 |

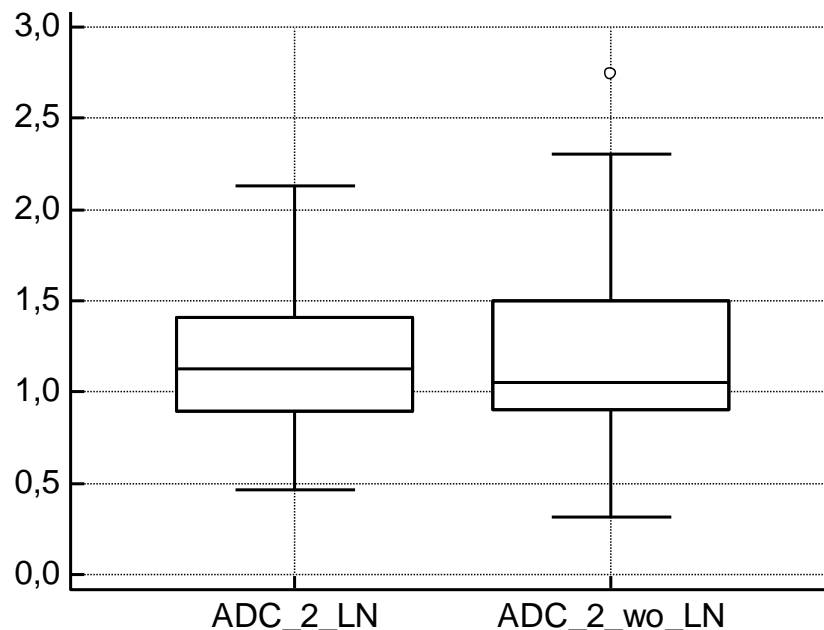

**Figure 4:** ADC\_2 stratified by pathology (lymph node cases vs. non lymph node cases: LK vs wo\_LN). ADC (y-axis) are given in [ $10^{-3}$  mm<sup>2</sup>/s].

## ADC\_3

| Sample 1              |                  |                  |
|-----------------------|------------------|------------------|
| Variable              | ADC_3_LN         |                  |
| Sample 2              |                  |                  |
| Variable              | ADC_3_wo_LN      |                  |
|                       | Sample 1         | Sample 2         |
| Sample size           | 32               | 33               |
| Lowest value          | <u>0,4690</u>    | <u>0,3150</u>    |
| Highest value         | <u>2,1290</u>    | <u>2,7630</u>    |
| Median                | 1,1305           | 1,0550           |
| 95% CI for the median | 0,9629 to 1,2531 | 0,9883 to 1,2756 |
| Interquartile range   | 0,8935 to 1,4220 | 0,9038 to 1,4998 |

|                                       |            |
|---------------------------------------|------------|
| Average rank of first group           | 32,7344    |
| Average rank of second group          | 33,2576    |
| Mann-Whitney U                        | 519,50     |
| Test statistic Z (corrected for ties) | 0,112      |
| Two-tailed probability                | P = 0,9112 |

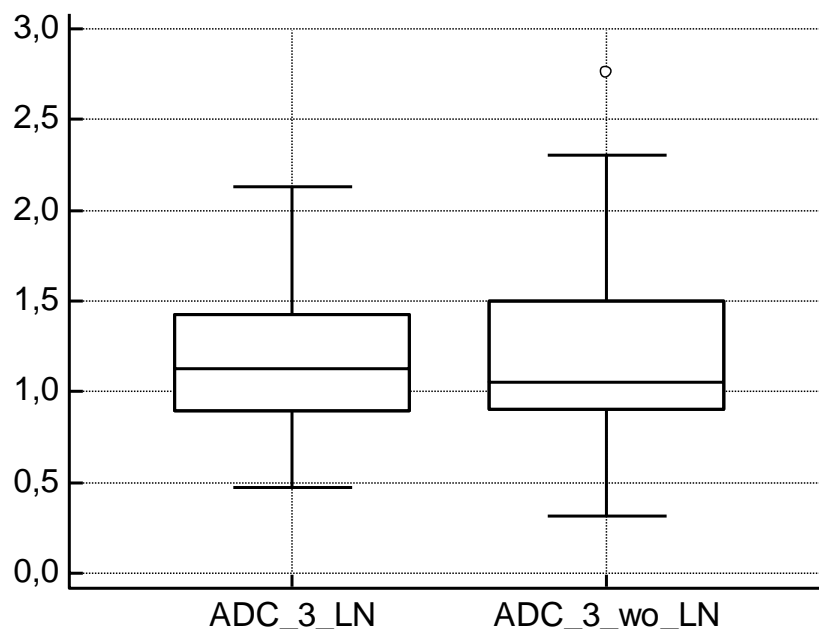

**Figure 5:** ADC<sub>3</sub> stratified by pathology (lymph node cases vs. non lymph node cases: LK vs wo\_LN). ADC (y-axis) are given in [ $10^{-3}$  mm<sup>2</sup>/s].

## ADC\_4

| Sample 1              |                  |                  |
|-----------------------|------------------|------------------|
| Variable              | ADC_4_LN         |                  |
| Sample 2              |                  |                  |
| Variable              | ADC_4_wo_LN      |                  |
|                       | Sample 1         | Sample 2         |
| Sample size           | 32               | 33               |
| Lowest value          | <u>0,4640</u>    | <u>0,3170</u>    |
| Highest value         | <u>2,0360</u>    | <u>2,5990</u>    |
| Median                | 1,0900           | 1,0250           |
| 95% CI for the median | 0,9690 to 1,3011 | 0,9246 to 1,2348 |
| Interquartile range   | 0,8600 to 1,3910 | 0,9055 to 1,3495 |

|                                       |            |
|---------------------------------------|------------|
| Average rank of first group           | 34,2344    |
| Average rank of second group          | 31,8030    |
| Mann-Whitney U                        | 488,50     |
| Test statistic Z (corrected for ties) | 0,518      |
| Two-tailed probability                | P = 0,6042 |

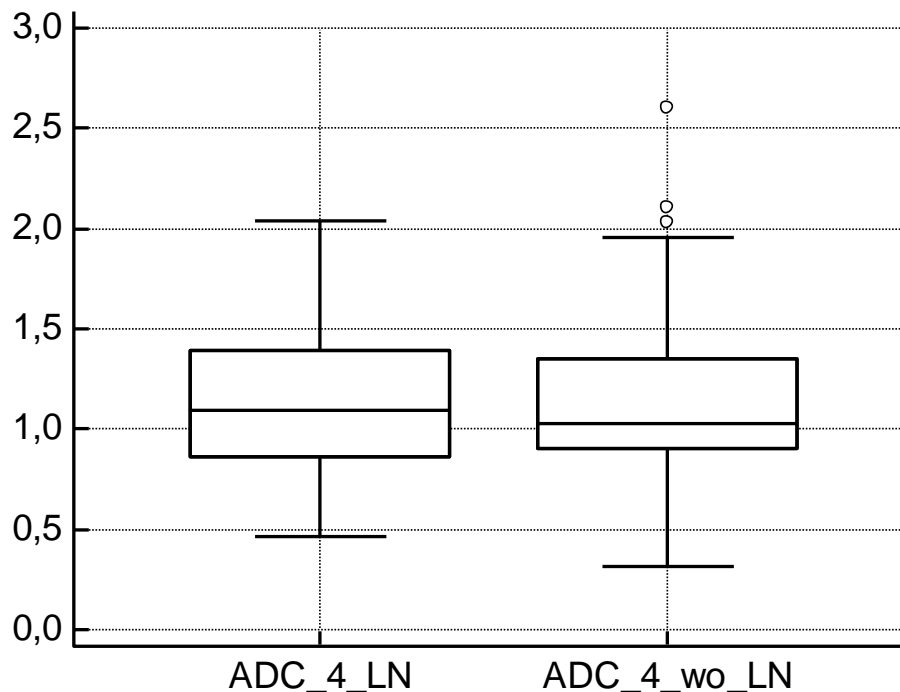

**Figure 6:** ADC<sub>4</sub> stratified by pathology (lymph node cases vs. non lymph node cases: LK vs wo\_LN). ADC (y-axis) are given in [10<sup>-3</sup> mm<sup>2</sup>/s].

## Part II

### Lymph node cases only

|       | Minimum | 25th percentile | Median | 75th percentile | Maximum |
|-------|---------|-----------------|--------|-----------------|---------|
| ADC_1 | 0,3210  | 0,850           | 1,080  | 1,360           | 1,994   |
| ADC_2 | 0,4640  | 0,896           | 1,123  | 1,406           | 2,133   |
| ADC_3 | 0,4690  | 0,894           | 1,131  | 1,422           | 2,129   |
| ADC_4 | 0,4640  | 0,860           | 1,090  | 1,391           | 2,036   |

| Variable  | Different (P<0,05) from variable nr |
|-----------|-------------------------------------|
| (1) ADC_1 | (2) (3) (4)                         |
| (2) ADC_2 | (1) (4)                             |
| (3) ADC_3 | (1) (4)                             |
| (4) ADC_4 | (1) (2) (3)                         |

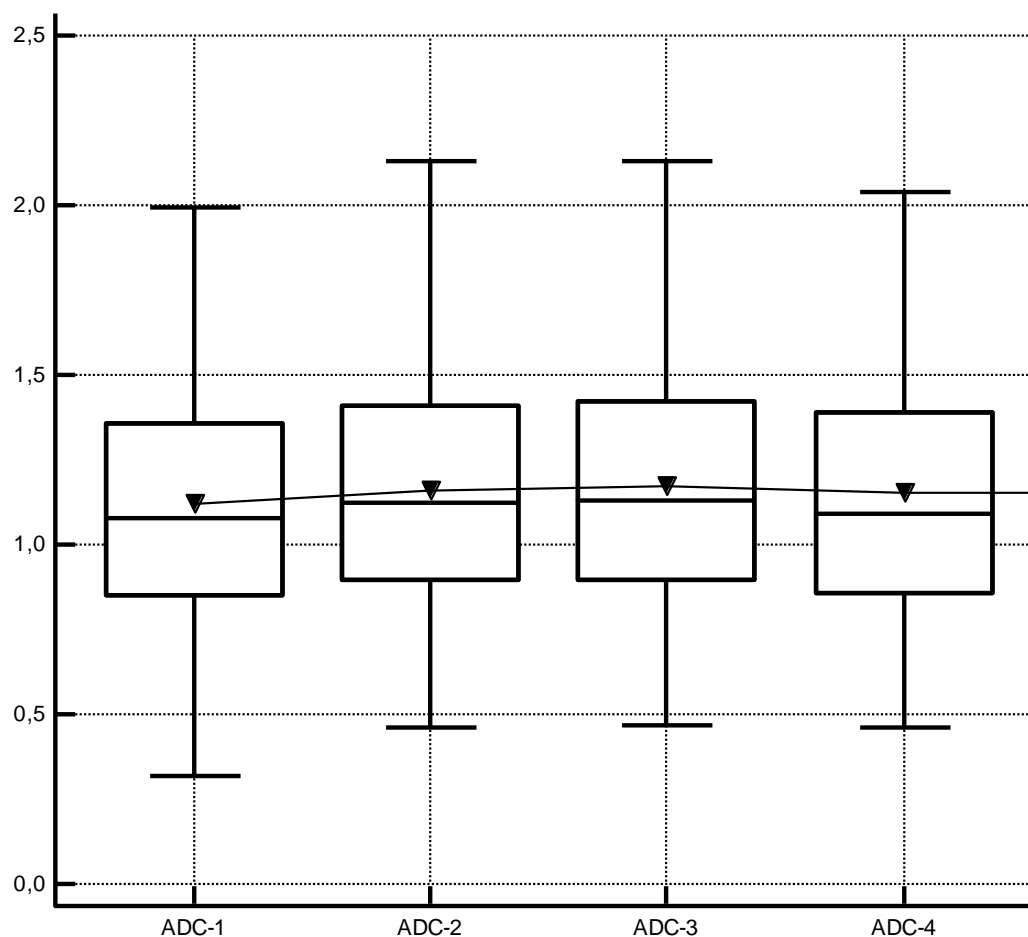

**Figure 7:** Lymph node cases stratified by PPM. ADC (y-axis) are given in  $[10^{-3} \text{ mm}^2/\text{s}]$ .

### Non lymph node cases only

|       | Minimum | 25th percentile | Median | 75th percentile | Maximum |
|-------|---------|-----------------|--------|-----------------|---------|
| ADC_1 | 0,3120  | 0,873           | 0,998  | 1,315           | 2,540   |
| ADC_2 | 0,3130  | 0,905           | 1,056  | 1,496           | 2,744   |
| ADC_3 | 0,3150  | 0,904           | 1,055  | 1,500           | 2,763   |
| ADC_4 | 0,3170  | 0,906           | 1,025  | 1,349           | 2,599   |

| Variable  | Different (P<0,05) from variable nr |
|-----------|-------------------------------------|
| (1) ADC_1 | (2) (3) (4)                         |
| (2) ADC_2 | (1) (4)                             |
| (3) ADC_3 | (1) (4)                             |
| (4) ADC_4 | (1) (2) (3)                         |

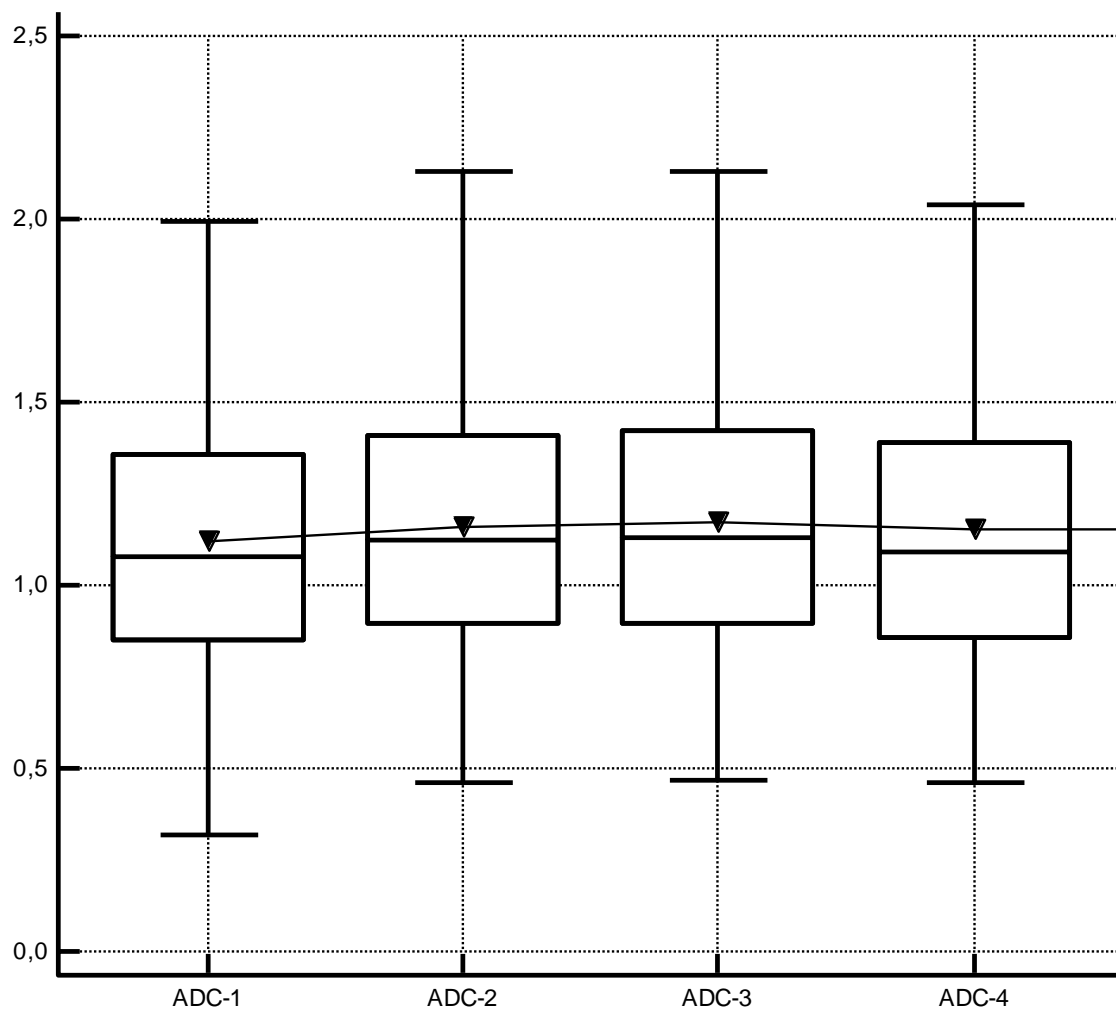

**Figure 8:** Non lymph node cases stratified by PPM. ADC (y-axis) are given in  $[10^{-3} \text{ mm}^2/\text{s}]$ .

## References

- [1] D. Le Bihan, É. Breton, Imagerie de diffusion in vivo par résonance magnétique nucléaire, C R Acad Sc Paris. (1985) 1109 – 1112.
- [2] D. Le Bihan, E. Breton, D. Lallemand, P. Grenier, E. Cabanis, M. Laval-Jeantet, MR imaging of intravoxel incoherent motions: application to diffusion and perfusion in neurologic disorders, Radiology. 161 (1986) 401–407.
- [3] R.M. El Kady, A.K. Choudhary, R. Tappouni, Accuracy of apparent diffusion coefficient value measurement on PACS workstation: A comparative analysis, AJR Am. J. Roentgenol. 196 (2011) W280–284.
- [4] A.-M. Legendre, Nouvelles méthodes pour la détermination des orbites des comètes, Firmin Didot, 1805.
- [5] C.F. Gauss, Theoria motus corporum coelestium in sectionibus conicis solem ambientium, Frid. Perthes et I. H. Besser, 1809.
- [6] P.M. Schulze, D. Porath, Statistik: mit Datenanalyse und ökonomischen Grundlagen, 7th ed., Oldenbourg, München, n.d.
- [7] Y.M. Park, Y.Y. Byun, Understanding the Mathematics Involved in Calculating Apparent Diffusion Coefficient Maps, AJR Am J Roentgenol. 199 (2012).
- [8] W. Conover, Practical nonparametric statistics, 3rd ed., Wiley & Sons, New York, 1999.
